# Supplementary material
Source: PubMed Central journal article supplement (PMC7319230)

## **Supplemental Material**

**Table S1: Search strategy used in each database searched.**

**Table S2: Assessment of the risk of bias of studies included in the meta-analysis using the refined Quality In Prognosis Studies (QUIPS) tool.**

**Figure 1: PRISMA flow chart outlining the literature search.**

Table S1: Search strategy used in each database searched.

| Database | Search Strategy                                                                                                                                                                                                                                                                                                                                                                                                                                                                                                                                                                                                                                                                                                                                                                                                                                                                                                                                                                                 | Articles retrieved |
|----------|-------------------------------------------------------------------------------------------------------------------------------------------------------------------------------------------------------------------------------------------------------------------------------------------------------------------------------------------------------------------------------------------------------------------------------------------------------------------------------------------------------------------------------------------------------------------------------------------------------------------------------------------------------------------------------------------------------------------------------------------------------------------------------------------------------------------------------------------------------------------------------------------------------------------------------------------------------------------------------------------------|--------------------|
| MEDLINE  | <p>(((("liver"[MeSH Terms] OR "liver"[All Fields]) AND stiffness[All Fields]) OR ("liver cirrhosis"[MeSH Terms] OR ("liver"[All Fields] AND "cirrhosis"[All Fields]) OR "liver cirrhosis"[All Fields] OR ("liver"[All Fields] AND "fibrosis"[All Fields]) OR "liver fibrosis"[All Fields]) OR ("liver diseases"[MeSH Terms] OR ("liver"[All Fields] AND "diseases"[All Fields]) OR "liver diseases"[All Fields] OR ("liver"[All Fields] AND "dysfunction"[All Fields]) OR "liver dysfunction"[All Fields]) OR ("non-alcoholic fatty liver disease"[MeSH Terms] OR ("non-alcoholic"[All Fields] AND "fatty"[All Fields] AND "liver"[All Fields] AND "disease"[All Fields]) OR "non-alcoholic fatty liver disease"[All Fields] OR "nafld"[All Fields]) OR ("elasticity imaging techniques"[MeSH Terms] OR ("elasticity"[All Fields] AND "imaging"[All Fields] AND "techniques"[All Fields]) OR "elasticity imaging techniques"[All Fields] OR "elastography"[All Fields]) OR ("fibrosis"[MeSH</p> | 5,687              |

|        |                                                                                                                                                                                                                                                                                                                                                                                                                                                      |       |
|--------|------------------------------------------------------------------------------------------------------------------------------------------------------------------------------------------------------------------------------------------------------------------------------------------------------------------------------------------------------------------------------------------------------------------------------------------------------|-------|
|        | <p>Terms] OR "fibrosis"[All Fields]) AND score[All Fields]) OR fibrosis-4[All Fields] OR (virtual[All Fields] AND ("touch"[MeSH Terms] OR "touch"[All Fields] OR "therapeutic touch"[MeSH Terms] OR ("therapeutic"[All Fields] AND "touch"[All Fields]) OR "therapeutic touch"[All Fields]) AND quantification[All Fields])) AND ("heart failure"[MeSH Terms] OR ("heart"[All Fields] AND "failure"[All Fields]) OR "heart failure"[All Fields])</p> |       |
| Scopus | <p>( TITLE-ABS-KEY ( liver AND fibrosis ) OR TITLE-ABS-KEY ( liver AND stiffness ) OR TITLE-ABS-KEY ( liver AND dysfunction ) OR TITLE-ABS-KEY ( nafld ) OR TITLE-ABS-KEY ( elastography ) OR TITLE-ABS-KEY ( fibrosis AND score ) OR TITLE-ABS-KEY ( fibrosis-4 ) OR TITLE-ABS-KEY ( virtual AND touch AND quantification ) AND TITLE-ABS-KEY ( heart AND failure ) )</p>                                                                           | 6,712 |

Table S2: Assessment of the risk of bias of studies included in the meta-analysis using the refined Quality In Prognosis Studies (QUIPS) tool.

| Study name          | Study Participation | Study Attrition | Prognostic Factor Measurement | Outcome Measurement | Study Confounding | Statistical Analysis and Reporting |
|---------------------|---------------------|-----------------|-------------------------------|---------------------|-------------------|------------------------------------|
| Saito, 2018 (3)     | low                 | moderate        | low                           | low                 | low               | low                                |
| Takahashi, 2018 (4) | low                 | low             | low                           | low                 | low               | low                                |
| Taniguchi, 2018 (2) | low                 | low             | low                           | low                 | low               | low                                |
| Sato, 2017 (5)      | low                 | low             | low                           | low                 | low               | low                                |

Figure 1: PRISMA flow chart outlining the literature search.

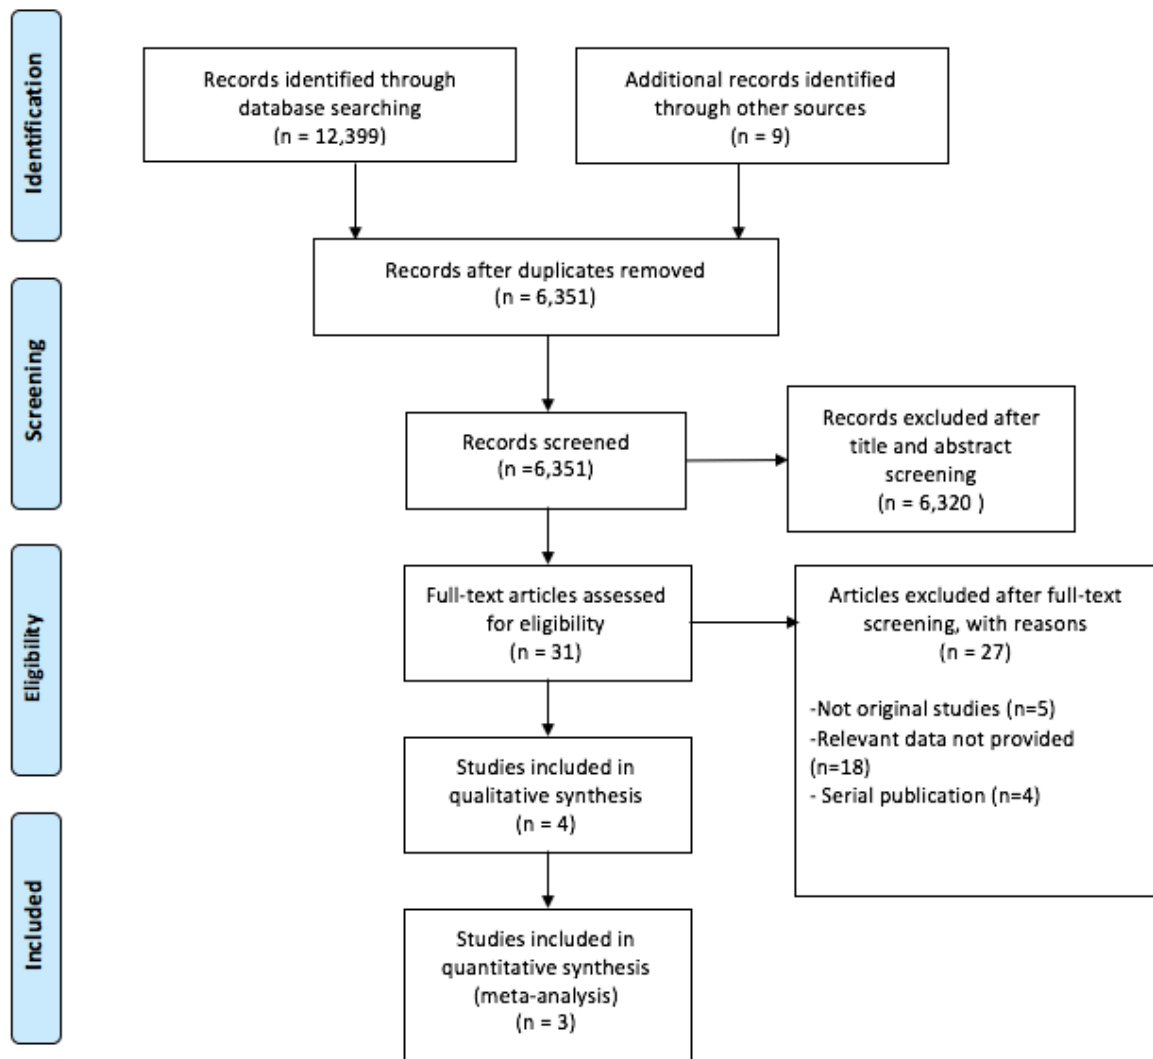

Supplement: NIHMS1594158-supplement-Supplement_Material.pdf [file NIHMS1594158-supplement-Supplement_Material.pdf]
